# Supplementary material
Source: Springer Nature journal article supplement (https://www.springermedizin.de/resource/supplementary/12985_2014_2425_MOESM1_ESM.pdf/9607068)

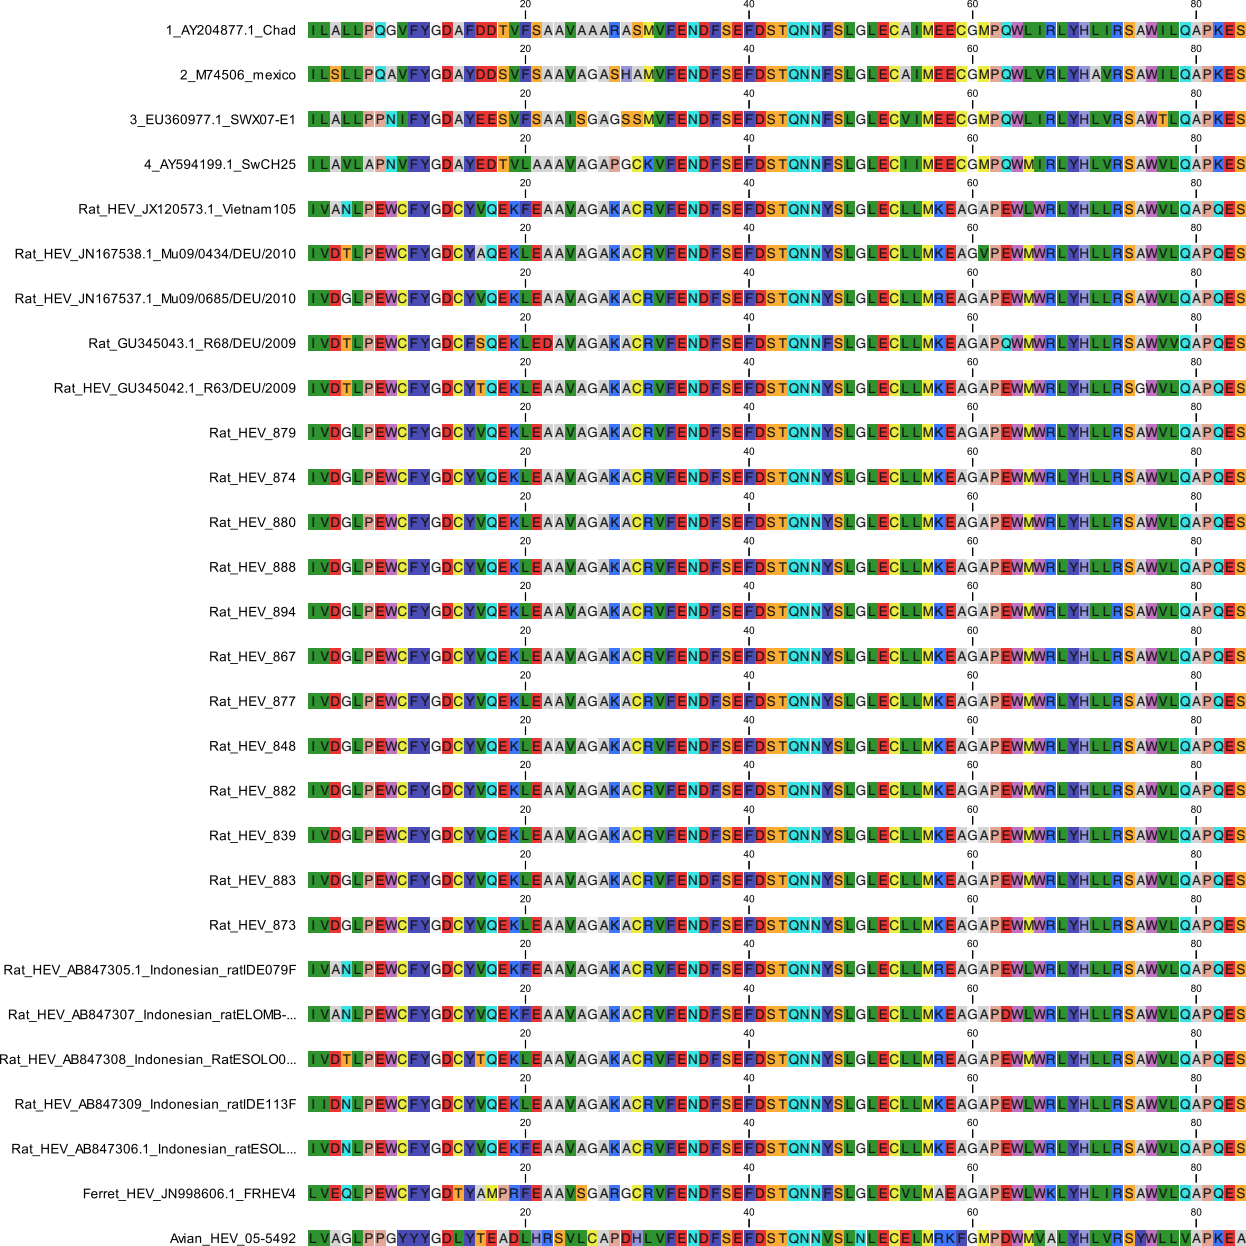

Supplement: MOESM1 [file 9607068]
